# Supplementary material for: Multiplexed Massively Parallel Sequencing of Plastomes Provides Insights Into the Genetic Diversity, Population Structure, and Phylogeography of Wild and Cultivated Coptis chinensis
Source: Front Plant Sci. 2022 Jul 7;13:923600. doi: 10.3389/fpls.2022.923600 (PMC9302112; doi:10.3389/fpls.2022.923600)
Supplement: Supplementary file 4 [file Table_1.xlsx]

## Sheet: Sheet1
Table S1. Detail information of 27 sequenced or downloaded chloroplast genome of Coptis species
ID	Organism	Location	LSC	IR	SSC	Total length (bp)	%GC	Protein-coding genes	Transfer RNA genes	Ribosomal RNA genes	GB accession no.
HS01	Coptis chinensis var. brevisepala	Huangshan, Anhui, China	85056	26215	17279	154765	0.382	80	29	4	OM202488
HS02	Coptis chinensis var. brevisepala	Huangshan, Anhui, China	85056	26215	17279	154765	0.382	80	29	4	OM202489
JGS01	Coptis chinensis var. brevisepala	Jinggangshan, Jiangxi, China	84959	26198	17295	154650	0.382	80	29	4	OM202498
JGS02	Coptis chinensis var. brevisepala	Jinggangshan, Jiangxi, China	84959	26198	17295	154650	0.382	80	29	4	OM202499
JN01	Coptis chinensis var. brevisepala	Jingning, Zhejiang, China	85055	26200	17272	154727	0.382	80	29	4	OM202496
JN02	Coptis chinensis var. brevisepala	Jingning, Zhejiang, China	85055	26200	17272	154727	0.382	80	29	4	OM202497
JY01	Coptis chinensis var. brevisepala	Jianyang, Fujian, China	85058	26214	17281	154767	0.382	80	29	4	OM202490
JY02	Coptis chinensis var. brevisepala	Jianyang, Fujian, China	85058	26214	17281	154767	0.382	80	29	4	OM202491
LS01	Coptis chinensis var. brevisepala	Longsheng, Guangxi, China	85161	26188	17318	154855	0.381	80	29	4	OM202492
LS02	Coptis chinensis var. brevisepala	Longsheng, Guangxi, China	85161	26188	17318	154855	0.381	80	29	4	OM202493
RY01	Coptis chinensis var. brevisepala	Ruyuan, Guangdong, China	84967	26198	17278	154641	0.382	80	29	4	OM202494
RY02	Coptis chinensis var. brevisepala	Ruyuan, Guangdong, China	84967	26198	17278	154641	0.382	80	29	4	OM202495
KL01	Coptis chinensis var. chinensis	Kaili, Guizhou, China	85160	26192	17292	154836	0.382	80	29	4	OM202500
KL02	Coptis chinensis var. chinensis	Kaili, Guizhou, China	85161	26192	17292	154837	0.382	80	29	4	OM202502
LCC01	Coptis chinensis var. chinensis	Lichuan, Hubei, China	85155	26185	17294	154819	0.382	80	29	4	OM202506
LCW01	Coptis chinensis var. chinensis	Lichuan, Hubei, China	85168	26185	17275	154813	0.382	80	29	4	OM202508
PZC01	Coptis chinensis var. chinensis	Pengzhou, Sichuan, China	85162	26192	17292	154838	0.382	80	29	4	OM202503
PZW01	Coptis chinensis var. chinensis	Pengzhou, Sichuan, China	85148	26185	17293	154811	0.382	80	29	4	OM202504
SZ01	Coptis chinensis var. chinensis	Shizhu, Chongqing, China	85162	26192	17292	154838	0.382	80	29	4	OM202505
SZ02	Coptis chinensis var. chinensis	Shizhu, Chongqing, China	85156	26185	17294	154820	0.382	80	29	4	OM202507
XX01	Coptis chinensis var. chinensis	Xiangxi, Hunan, China	85168	26185	17275	154813	0.382	80	29	4	OM202509
XX02	Coptis chinensis var. chinensis	Xiangxi, Hunan, China	85160	26192	17292	154836	0.382	80	29	4	OM202501
EMS3-01	Coptis deltoidea	Emeishan, Sichuan, China	84931	26154	17299	154538	0.382	80	29	4	OM202510
GenBank	Coptis japonica	/	85060	26225	17475	154985	0.382	/	/	/	MT773635
GenBank	Coptis omeiensis	/	84913	26180	17300	154573	0.382	/	/	/	MT773636
GenBank	Coptis quinquesecta	/	85114	26200	17232	154746	0.382	/	/	/	MT773637
GenBank	Coptis teeta	/	84240	26183	17550	154156	0.382	/	/	/	MT773638
