# Supplementary material for: Multiplexed Massively Parallel Sequencing of Plastomes Provides Insights Into the Genetic Diversity, Population Structure, and Phylogeography of Wild and Cultivated Coptis chinensis
Source: Front Plant Sci. 2022 Jul 7;13:923600. doi: 10.3389/fpls.2022.923600 (PMC9302112; doi:10.3389/fpls.2022.923600)
Supplement: Supplementary file 5 [file Table_2.xlsx]

## Sheet: Sheet1
Table S2. Detailed information of datasets generated by two different approaches
	aligned size(bp)	Number of C. chinensis accessions	Nucleotide diversity (p)	variable site	Dataset
Direct cpgs sequencing (with outgroup)	156497	27	0.00282	2531	I
Direct cpgs sequencing	155489	22	0.00197	926
Massively parallel sequencing (with outgroup)	43354	227	0.00305	1080	II
Massively parallel sequencing	43283	223	0.00293	917	III
