# Supplementary material for: Multiplexed Massively Parallel Sequencing of Plastomes Provides Insights Into the Genetic Diversity, Population Structure, and Phylogeography of Wild and Cultivated Coptis chinensis
Source: Front Plant Sci. 2022 Jul 7;13:923600. doi: 10.3389/fpls.2022.923600 (PMC9302112; doi:10.3389/fpls.2022.923600)
Supplement: Supplementary file 6 [file Table_3.XLSX]

## Sheet: 30 documents from Carduoideae
Table S3. Detail information of 227 accessions for population analysis
ID	Organism	subpopulation	Location
HS01	Coptis chinensis var. brevisepala	HS	Huangshan, Anhui, China
HS02	Coptis chinensis var. brevisepala	HS	Huangshan, Anhui, China
HS04	Coptis chinensis var. brevisepala	HS	Huangshan, Anhui, China
HS05	Coptis chinensis var. brevisepala	HS	Huangshan, Anhui, China
HS07	Coptis chinensis var. brevisepala	HS	Huangshan, Anhui, China
HS08	Coptis chinensis var. brevisepala	HS	Huangshan, Anhui, China
HS14	Coptis chinensis var. brevisepala	HS	Huangshan, Anhui, China
HS16	Coptis chinensis var. brevisepala	HS	Huangshan, Anhui, China
HS17	Coptis chinensis var. brevisepala	HS	Huangshan, Anhui, China
HS19	Coptis chinensis var. brevisepala	HS	Huangshan, Anhui, China
HS20	Coptis chinensis var. brevisepala	HS	Huangshan, Anhui, China
HS21	Coptis chinensis var. brevisepala	HS	Huangshan, Anhui, China
HS22	Coptis chinensis var. brevisepala	HS	Huangshan, Anhui, China
HS25	Coptis chinensis var. brevisepala	HS	Huangshan, Anhui, China
HS26	Coptis chinensis var. brevisepala	HS	Huangshan, Anhui, China
HS29	Coptis chinensis var. brevisepala	HS	Huangshan, Anhui, China
HS30	Coptis chinensis var. brevisepala	HS	Huangshan, Anhui, China
JGS01	Coptis chinensis var. brevisepala	JGS	Jinggangshan, Jiangxi, China
JGS02	Coptis chinensis var. brevisepala	JGS	Jinggangshan, Jiangxi, China
JGS03	Coptis chinensis var. brevisepala	JGS	Jinggangshan, Jiangxi, China
JGS06	Coptis chinensis var. brevisepala	JGS	Jinggangshan, Jiangxi, China
JGS07	Coptis chinensis var. brevisepala	JGS	Jinggangshan, Jiangxi, China
JGS08	Coptis chinensis var. brevisepala	JGS	Jinggangshan, Jiangxi, China
JGS10	Coptis chinensis var. brevisepala	JGS	Jinggangshan, Jiangxi, China
JGS11	Coptis chinensis var. brevisepala	JGS	Jinggangshan, Jiangxi, China
JGS13	Coptis chinensis var. brevisepala	JGS	Jinggangshan, Jiangxi, China
JGS15	Coptis chinensis var. brevisepala	JGS	Jinggangshan, Jiangxi, China
JGS16	Coptis chinensis var. brevisepala	JGS	Jinggangshan, Jiangxi, China
JGS17	Coptis chinensis var. brevisepala	JGS	Jinggangshan, Jiangxi, China
JGS18	Coptis chinensis var. brevisepala	JGS	Jinggangshan, Jiangxi, China
JGS20	Coptis chinensis var. brevisepala	JGS	Jinggangshan, Jiangxi, China
JGS21	Coptis chinensis var. brevisepala	JGS	Jinggangshan, Jiangxi, China
JGS22	Coptis chinensis var. brevisepala	JGS	Jinggangshan, Jiangxi, China
JGS23	Coptis chinensis var. brevisepala	JGS	Jinggangshan, Jiangxi, China
JGS24	Coptis chinensis var. brevisepala	JGS	Jinggangshan, Jiangxi, China
JGS25	Coptis chinensis var. brevisepala	JGS	Jinggangshan, Jiangxi, China
JGS26	Coptis chinensis var. brevisepala	JGS	Jinggangshan, Jiangxi, China
JGS27	Coptis chinensis var. brevisepala	JGS	Jinggangshan, Jiangxi, China
JGS28	Coptis chinensis var. brevisepala	JGS	Jinggangshan, Jiangxi, China
JGS29	Coptis chinensis var. brevisepala	JGS	Jinggangshan, Jiangxi, China
JN01	Coptis chinensis var. brevisepala	JN	Jingning, Zhejiang, China
JN02	Coptis chinensis var. brevisepala	JN	Jingning, Zhejiang, China
JN03	Coptis chinensis var. brevisepala	JN	Jingning, Zhejiang, China
JN04	Coptis chinensis var. brevisepala	JN	Jingning, Zhejiang, China
JN05	Coptis chinensis var. brevisepala	JN	Jingning, Zhejiang, China
JN06	Coptis chinensis var. brevisepala	JN	Jingning, Zhejiang, China
JN07	Coptis chinensis var. brevisepala	JN	Jingning, Zhejiang, China
JN08	Coptis chinensis var. brevisepala	JN	Jingning, Zhejiang, China
JN10	Coptis chinensis var. brevisepala	JN	Jingning, Zhejiang, China
JN11	Coptis chinensis var. brevisepala	JN	Jingning, Zhejiang, China
JN12	Coptis chinensis var. brevisepala	JN	Jingning, Zhejiang, China
JN13	Coptis chinensis var. brevisepala	JN	Jingning, Zhejiang, China
JN15	Coptis chinensis var. brevisepala	JN	Jingning, Zhejiang, China
JN16	Coptis chinensis var. brevisepala	JN	Jingning, Zhejiang, China
JN17	Coptis chinensis var. brevisepala	JN	Jingning, Zhejiang, China
JN18	Coptis chinensis var. brevisepala	JN	Jingning, Zhejiang, China
JN19	Coptis chinensis var. brevisepala	JN	Jingning, Zhejiang, China
JN27	Coptis chinensis var. brevisepala	JN	Jingning, Zhejiang, China
JN28	Coptis chinensis var. brevisepala	JN	Jingning, Zhejiang, China
JN30	Coptis chinensis var. brevisepala	JN	Jingning, Zhejiang, China
JY01	Coptis chinensis var. brevisepala	JY	Jianyang, Fujian, China
JY02	Coptis chinensis var. brevisepala	JY	Jianyang, Fujian, China
JY03	Coptis chinensis var. brevisepala	JY	Jianyang, Fujian, China
JY04	Coptis chinensis var. brevisepala	JY	Jianyang, Fujian, China
JY05	Coptis chinensis var. brevisepala	JY	Jianyang, Fujian, China
JY06	Coptis chinensis var. brevisepala	JY	Jianyang, Fujian, China
JY07	Coptis chinensis var. brevisepala	JY	Jianyang, Fujian, China
JY09	Coptis chinensis var. brevisepala	JY	Jianyang, Fujian, China
JY10	Coptis chinensis var. brevisepala	JY	Jianyang, Fujian, China
JY11	Coptis chinensis var. brevisepala	JY	Jianyang, Fujian, China
JY12	Coptis chinensis var. brevisepala	JY	Jianyang, Fujian, China
JY13	Coptis chinensis var. brevisepala	JY	Jianyang, Fujian, China
JY14	Coptis chinensis var. brevisepala	JY	Jianyang, Fujian, China
JY15	Coptis chinensis var. brevisepala	JY	Jianyang, Fujian, China
JY16	Coptis chinensis var. brevisepala	JY	Jianyang, Fujian, China
JY17	Coptis chinensis var. brevisepala	JY	Jianyang, Fujian, China
JY18	Coptis chinensis var. brevisepala	JY	Jianyang, Fujian, China
JY19	Coptis chinensis var. brevisepala	JY	Jianyang, Fujian, China
JY20	Coptis chinensis var. brevisepala	JY	Jianyang, Fujian, China
JY22	Coptis chinensis var. brevisepala	JY	Jianyang, Fujian, China
JY23	Coptis chinensis var. brevisepala	JY	Jianyang, Fujian, China
JY24	Coptis chinensis var. brevisepala	JY	Jianyang, Fujian, China
JY26	Coptis chinensis var. brevisepala	JY	Jianyang, Fujian, China
JY27	Coptis chinensis var. brevisepala	JY	Jianyang, Fujian, China
JY28	Coptis chinensis var. brevisepala	JY	Jianyang, Fujian, China
JY30	Coptis chinensis var. brevisepala	JY	Jianyang, Fujian, China
LS01	Coptis chinensis var. brevisepala	LS	Longsheng, Guangxi, China
LS02	Coptis chinensis var. brevisepala	LS	Longsheng, Guangxi, China
LS05	Coptis chinensis var. brevisepala	LS	Longsheng, Guangxi, China
LS06	Coptis chinensis var. brevisepala	LS	Longsheng, Guangxi, China
LS07	Coptis chinensis var. brevisepala	LS	Longsheng, Guangxi, China
LS08	Coptis chinensis var. brevisepala	LS	Longsheng, Guangxi, China
LS10	Coptis chinensis var. brevisepala	LS	Longsheng, Guangxi, China
LS11	Coptis chinensis var. brevisepala	LS	Longsheng, Guangxi, China
LS18	Coptis chinensis var. brevisepala	LS	Longsheng, Guangxi, China
LS20	Coptis chinensis var. brevisepala	LS	Longsheng, Guangxi, China
LS21	Coptis chinensis var. brevisepala	LS	Longsheng, Guangxi, China
LS22	Coptis chinensis var. brevisepala	LS	Longsheng, Guangxi, China
LS24	Coptis chinensis var. brevisepala	LS	Longsheng, Guangxi, China
LS27	Coptis chinensis var. brevisepala	LS	Longsheng, Guangxi, China
LS28	Coptis chinensis var. brevisepala	LS	Longsheng, Guangxi, China
LS29	Coptis chinensis var. brevisepala	LS	Longsheng, Guangxi, China
RY01	Coptis chinensis var. brevisepala	RY	Ruyuan, Guangdong, China
RY02	Coptis chinensis var. brevisepala	RY	Ruyuan, Guangdong, China
RY03	Coptis chinensis var. brevisepala	RY	Ruyuan, Guangdong, China
RY04	Coptis chinensis var. brevisepala	RY	Ruyuan, Guangdong, China
RY05	Coptis chinensis var. brevisepala	RY	Ruyuan, Guangdong, China
RY06	Coptis chinensis var. brevisepala	RY	Ruyuan, Guangdong, China
RY07	Coptis chinensis var. brevisepala	RY	Ruyuan, Guangdong, China
RY08	Coptis chinensis var. brevisepala	RY	Ruyuan, Guangdong, China
RY09	Coptis chinensis var. brevisepala	RY	Ruyuan, Guangdong, China
RY10	Coptis chinensis var. brevisepala	RY	Ruyuan, Guangdong, China
KL01	Coptis chinensis var. chinensis	KL	Kaili, Guizhou, China
KL02	Coptis chinensis var. chinensis	KL	Kaili, Guizhou, China
KL03	Coptis chinensis var. chinensis	KL	Kaili, Guizhou, China
KL04	Coptis chinensis var. chinensis	KL	Kaili, Guizhou, China
KL05	Coptis chinensis var. chinensis	KL	Kaili, Guizhou, China
KL06	Coptis chinensis var. chinensis	KL	Kaili, Guizhou, China
KL07	Coptis chinensis var. chinensis	KL	Kaili, Guizhou, China
KL08	Coptis chinensis var. chinensis	KL	Kaili, Guizhou, China
KL09	Coptis chinensis var. chinensis	KL	Kaili, Guizhou, China
KL10	Coptis chinensis var. chinensis	KL	Kaili, Guizhou, China
KL11	Coptis chinensis var. chinensis	KL	Kaili, Guizhou, China
KL12	Coptis chinensis var. chinensis	KL	Kaili, Guizhou, China
LCC01	Coptis chinensis var. chinensis	LC	Lichuan, Hubei, China
LCC02	Coptis chinensis var. chinensis	LC	Lichuan, Hubei, China
LCC04	Coptis chinensis var. chinensis	LC	Lichuan, Hubei, China
LCC05	Coptis chinensis var. chinensis	LC	Lichuan, Hubei, China
LCC06	Coptis chinensis var. chinensis	LC	Lichuan, Hubei, China
LCC07	Coptis chinensis var. chinensis	LC	Lichuan, Hubei, China
LCC09	Coptis chinensis var. chinensis	LC	Lichuan, Hubei, China
LCC11	Coptis chinensis var. chinensis	LC	Lichuan, Hubei, China
LCC12	Coptis chinensis var. chinensis	LC	Lichuan, Hubei, China
LCC13	Coptis chinensis var. chinensis	LC	Lichuan, Hubei, China
LCC14	Coptis chinensis var. chinensis	LC	Lichuan, Hubei, China
LCC22	Coptis chinensis var. chinensis	LC	Lichuan, Hubei, China
LCC23	Coptis chinensis var. chinensis	LC	Lichuan, Hubei, China
LCC27	Coptis chinensis var. chinensis	LC	Lichuan, Hubei, China
LCC28	Coptis chinensis var. chinensis	LC	Lichuan, Hubei, China
LCC29	Coptis chinensis var. chinensis	LC	Lichuan, Hubei, China
LCC30	Coptis chinensis var. chinensis	LC	Lichuan, Hubei, China
LCW01	Coptis chinensis var. chinensis	LC	Lichuan, Hubei, China
LCW02	Coptis chinensis var. chinensis	LC	Lichuan, Hubei, China
LCW06	Coptis chinensis var. chinensis	LC	Lichuan, Hubei, China
LCW07	Coptis chinensis var. chinensis	LC	Lichuan, Hubei, China
LCW08	Coptis chinensis var. chinensis	LC	Lichuan, Hubei, China
LCW10	Coptis chinensis var. chinensis	LC	Lichuan, Hubei, China
LCW14	Coptis chinensis var. chinensis	LC	Lichuan, Hubei, China
LCW17	Coptis chinensis var. chinensis	LC	Lichuan, Hubei, China
LCW18	Coptis chinensis var. chinensis	LC	Lichuan, Hubei, China
LCW19	Coptis chinensis var. chinensis	LC	Lichuan, Hubei, China
LCW20	Coptis chinensis var. chinensis	LC	Lichuan, Hubei, China
LCW22	Coptis chinensis var. chinensis	LC	Lichuan, Hubei, China
LCW24	Coptis chinensis var. chinensis	LC	Lichuan, Hubei, China
LCW26	Coptis chinensis var. chinensis	LC	Lichuan, Hubei, China
LCW27	Coptis chinensis var. chinensis	LC	Lichuan, Hubei, China
LCW29	Coptis chinensis var. chinensis	LC	Lichuan, Hubei, China
LCW30	Coptis chinensis var. chinensis	LC	Lichuan, Hubei, China
PZC01	Coptis chinensis var. chinensis	PZ	Pengzhou, Sichuan, China
PZC02	Coptis chinensis var. chinensis	PZ	Pengzhou, Sichuan, China
PZC03	Coptis chinensis var. chinensis	PZ	Pengzhou, Sichuan, China
PZC06	Coptis chinensis var. chinensis	PZ	Pengzhou, Sichuan, China
PZC07	Coptis chinensis var. chinensis	PZ	Pengzhou, Sichuan, China
PZC14	Coptis chinensis var. chinensis	PZ	Pengzhou, Sichuan, China
PZC15	Coptis chinensis var. chinensis	PZ	Pengzhou, Sichuan, China
PZC16	Coptis chinensis var. chinensis	PZ	Pengzhou, Sichuan, China
PZC20	Coptis chinensis var. chinensis	PZ	Pengzhou, Sichuan, China
PZC21	Coptis chinensis var. chinensis	PZ	Pengzhou, Sichuan, China
PZW01	Coptis chinensis var. chinensis	PZ	Pengzhou, Sichuan, China
PZW02	Coptis chinensis var. chinensis	PZ	Pengzhou, Sichuan, China
PZW03	Coptis chinensis var. chinensis	PZ	Pengzhou, Sichuan, China
PZW07	Coptis chinensis var. chinensis	PZ	Pengzhou, Sichuan, China
PZW09	Coptis chinensis var. chinensis	PZ	Pengzhou, Sichuan, China
PZW10	Coptis chinensis var. chinensis	PZ	Pengzhou, Sichuan, China
PZW14	Coptis chinensis var. chinensis	PZ	Pengzhou, Sichuan, China
PZW17	Coptis chinensis var. chinensis	PZ	Pengzhou, Sichuan, China
PZW19	Coptis chinensis var. chinensis	PZ	Pengzhou, Sichuan, China
PZW20	Coptis chinensis var. chinensis	PZ	Pengzhou, Sichuan, China
PZW22	Coptis chinensis var. chinensis	PZ	Pengzhou, Sichuan, China
PZW23	Coptis chinensis var. chinensis	PZ	Pengzhou, Sichuan, China
PZW29	Coptis chinensis var. chinensis	PZ	Pengzhou, Sichuan, China
PZW30	Coptis chinensis var. chinensis	PZ	Pengzhou, Sichuan, China
SZ01	Coptis chinensis var. chinensis	SZ	Shizhu, Chongqing, China
SZ02	Coptis chinensis var. chinensis	SZ	Shizhu, Chongqing, China
SZ03	Coptis chinensis var. chinensis	SZ	Shizhu, Chongqing, China
SZ04	Coptis chinensis var. chinensis	SZ	Shizhu, Chongqing, China
SZ05	Coptis chinensis var. chinensis	SZ	Shizhu, Chongqing, China
SZ07	Coptis chinensis var. chinensis	SZ	Shizhu, Chongqing, China
SZ09	Coptis chinensis var. chinensis	SZ	Shizhu, Chongqing, China
SZ11	Coptis chinensis var. chinensis	SZ	Shizhu, Chongqing, China
SZ12	Coptis chinensis var. chinensis	SZ	Shizhu, Chongqing, China
SZ13	Coptis chinensis var. chinensis	SZ	Shizhu, Chongqing, China
SZ14	Coptis chinensis var. chinensis	SZ	Shizhu, Chongqing, China
SZ16	Coptis chinensis var. chinensis	SZ	Shizhu, Chongqing, China
SZ20	Coptis chinensis var. chinensis	SZ	Shizhu, Chongqing, China
SZ22	Coptis chinensis var. chinensis	SZ	Shizhu, Chongqing, China
SZ23	Coptis chinensis var. chinensis	SZ	Shizhu, Chongqing, China
SZ25	Coptis chinensis var. chinensis	SZ	Shizhu, Chongqing, China
SZ26	Coptis chinensis var. chinensis	SZ	Shizhu, Chongqing, China
SZ28	Coptis chinensis var. chinensis	SZ	Shizhu, Chongqing, China
SZ29	Coptis chinensis var. chinensis	SZ	Shizhu, Chongqing, China
XX01	Coptis chinensis var. chinensis	XX	Xiangxi, Hunan, China
XX02	Coptis chinensis var. chinensis	XX	Xiangxi, Hunan, China
XX03	Coptis chinensis var. chinensis	XX	Xiangxi, Hunan, China
XX04	Coptis chinensis var. chinensis	XX	Xiangxi, Hunan, China
XX07	Coptis chinensis var. chinensis	XX	Xiangxi, Hunan, China
XX08	Coptis chinensis var. chinensis	XX	Xiangxi, Hunan, China
XX09	Coptis chinensis var. chinensis	XX	Xiangxi, Hunan, China
XX10	Coptis chinensis var. chinensis	XX	Xiangxi, Hunan, China
XX11	Coptis chinensis var. chinensis	XX	Xiangxi, Hunan, China
XX13	Coptis chinensis var. chinensis	XX	Xiangxi, Hunan, China
XX14	Coptis chinensis var. chinensis	XX	Xiangxi, Hunan, China
XX15	Coptis chinensis var. chinensis	XX	Xiangxi, Hunan, China
XX16	Coptis chinensis var. chinensis	XX	Xiangxi, Hunan, China
XX18	Coptis chinensis var. chinensis	XX	Xiangxi, Hunan, China
XX20	Coptis chinensis var. chinensis	XX	Xiangxi, Hunan, China
XX21	Coptis chinensis var. chinensis	XX	Xiangxi, Hunan, China
XX23	Coptis chinensis var. chinensis	XX	Xiangxi, Hunan, China
XX24	Coptis chinensis var. chinensis	XX	Xiangxi, Hunan, China
XX25	Coptis chinensis var. chinensis	XX	Xiangxi, Hunan, China
XX28	Coptis chinensis var. chinensis	XX	Xiangxi, Hunan, China
XX29	Coptis chinensis var. chinensis	XX	Xiangxi, Hunan, China
XX30	Coptis chinensis var. chinensis	XX	Xiangxi, Hunan, China
EMS101	Coptis omeiensis	outgroup	Emeishan, Sichuan, China
EMS102	Coptis omeiensis	outgroup	Emeishan, Sichuan, China
EMS201	Coptis omeiensis	outgroup	Emeishan, Sichuan, China
EMS202	Coptis omeiensis	outgroup	Emeishan, Sichuan, China
