# Supplementary material for: Multiplexed Massively Parallel Sequencing of Plastomes Provides Insights Into the Genetic Diversity, Population Structure, and Phylogeography of Wild and Cultivated Coptis chinensis
Source: Front Plant Sci. 2022 Jul 7;13:923600. doi: 10.3389/fpls.2022.923600 (PMC9302112; doi:10.3389/fpls.2022.923600)
Supplement: Supplementary file 7 [file Table_4.XLSX]

## Sheet: modelfinder
Table S4. The results of comparison of different models for phylogenetic reconstruction
No.	Model	-LnL	df	AIC	AICc	BIC
1	JC	245461	51	491024	491024	491532
2	JC+I	244443	52	488991	488991	489509
3	JC+G4	244846	52	489797	489797	490315
4	JC+I+G4	244537	53	489180	489180	489708
5	JC+R2	245063	53	490232	490232	490759
6	JC+R3	244404	55	488918	488918	489465
7	JC+R4	244312	57	488739	488739	489306
8	JC+R5	244310	59	488738	488739	489326
14	F81+F	240573	54	481254	481254	481792
15	F81+F+I	239588	55	479287	479287	479834
16	F81+F+G4	239964	55	480038	480038	480586
17	F81+F+I+G4	239619	56	479350	479350	479908
18	F81+F+R2	239589	56	479290	479290	479848
19	F81+F+R3	239450	58	479017	479017	479594
20	F81+F+R4	239446	60	479011	479011	479609
27	K2P	245248	52	490600	490600	491118
28	K2P+I	244228	53	488563	488563	489091
29	K2P+G4	244633	53	489372	489372	489900
30	K2P+I+G4	244238	54	488583	488583	489121
31	K2P+R2	244097	54	488303	488303	488840
32	K2P+R3	244097	56	488307	488307	488864
40	HKY+F	240328	55	480766	480766	481313
41	HKY+F+I	239357	56	478826	478826	479384
42	HKY+F+G4	239721	56	479554	479554	480112
43	HKY+F+I+G4	239359	57	478832	478832	479400
44	HKY+F+R2	239209	57	478533	478533	479100
45	HKY+F+R3	239209	59	478537	478537	479124
53	TNe	245248	53	490602	490602	491130
54	TNe+I	244227	54	488562	488562	489100
55	TNe+G4	244633	54	489373	489373	489911
56	TNe+I+G4	244227	55	488565	488565	489112
57	TNe+R2	244097	55	488304	488304	488852
58	TNe+R3	244097	57	488308	488308	488876
66	TN+F	240328	56	480768	480768	481325
67	TN+F+I	239357	57	478827	478827	479395
68	TN+F+G4	239721	57	479556	479556	480124
69	TN+F+I+G4	239351	58	478818	478818	479396
70	TN+F+R2	239209	58	478534	478534	479112
71	TN+F+R3	239209	60	478538	478538	479136
79	K3P	245179	53	490464	490464	490992
80	K3P+I	244158	54	488425	488425	488962
81	K3P+G4	244564	54	489236	489236	489773
82	K3P+I+G4	244158	55	488427	488427	488974
83	K3P+R2	244029	55	488167	488167	488715
84	K3P+R3	244028	57	488171	488171	488739
92	K3Pu+F	240230	56	480572	480572	481130
93	K3Pu+F+I	239272	57	478658	478658	479225
94	K3Pu+F+G4	239625	57	479365	479365	479933
95	K3Pu+F+I+G4	239264	58	478644	478644	479222
96	K3Pu+F+R2	239120	58	478356	478356	478934
97	K3Pu+F+R3	239120	60	478360	478360	478958
105	TPM2+F	240327	56	480766	480766	481323
106	TPM2+F+I	239350	57	478814	478814	479382
107	TPM2+F+G4	239720	57	479553	479554	480121
108	TPM2+F+I+G4	239345	58	478805	478805	479383
109	TPM2+F+R2	239205	58	478526	478526	479104
110	TPM2+F+R3	239205	60	478530	478530	479128
118	TPM2u+F	240327	56	480765	480765	481323
119	TPM2u+F+I	239350	57	478814	478814	479382
120	TPM2u+F+G4	239720	57	479553	479553	480121
121	TPM2u+F+I+G4	239344	58	478804	478804	479382
122	TPM2u+F+R2	239205	58	478526	478526	479104
123	TPM2u+F+R3	239205	60	478530	478530	479128
131	TPM3+F	240326	56	480763	480763	481321
132	TPM3+F+I	239347	57	478808	478808	479376
133	TPM3+F+G4	239718	57	479550	479550	480118
134	TPM3+F+I+G4	239341	58	478798	478798	479376
135	TPM3+F+R2	239203	58	478521	478521	479099
136	TPM3+F+R3	239203	60	478525	478525	479123
144	TPM3u+F	240326	56	480763	480763	481321
145	TPM3u+F+I	239347	57	478808	478808	479376
146	TPM3u+F+G4	239718	57	479550	479550	480118
147	TPM3u+F+I+G4	239340	58	478797	478797	479375
148	TPM3u+F+R2	239203	58	478521	478521	479099
149	TPM3u+F+R3	239203	60	478525	478525	479123
157	TIMe	245178	54	490465	490465	491002
158	TIMe+I	244157	55	488424	488424	488972
159	TIMe+G4	244563	55	489236	489236	489784
160	TIMe+I+G4	244155	56	488421	488421	488979
161	TIMe+R2	244028	56	488167	488167	488725
162	TIMe+R3	244028	58	488171	488171	488749
170	TIM+F	240230	57	480574	480574	481141
171	TIM+F+I	239272	58	478659	478659	479237
172	TIM+F+G4	239625	58	479367	479367	479945
173	TIM+F+I+G4	239262	59	478641	478641	479229
174	TIM+F+R2	239120	59	478358	478358	478945
175	TIM+F+R3	239120	61	478362	478362	478969
183	TIM2e	245227	54	490563	490563	491100
184	TIM2e+I	244182	55	488474	488474	489021
185	TIM2e+G4	244609	55	489328	489328	489876
186	TIM2e+I+G4	244179	56	488469	488469	489027
187	TIM2e+R2	244060	56	488232	488232	488790
188	TIM2e+R3	244060	58	488236	488237	488814
196	TIM2+F	240327	57	480768	480768	481335
197	TIM2+F+I	239350	58	478816	478816	479394
198	TIM2+F+G4	239720	58	479555	479555	480133
199	TIM2+F+I+G4	239339	59	478796	478796	479383
200	TIM2+F+R2	239205	59	478528	478528	479116
201	TIM2+F+R3	239205	61	478532	478532	479139
209	TIM3e	245225	54	490558	490558	491095
210	TIM3e+I	244174	55	488458	488458	489006
211	TIM3e+G4	244606	55	489321	489321	489869
212	TIM3e+I+G4	244170	56	488451	488451	489009
213	TIM3e+R2	244055	56	488223	488223	488780
214	TIM3e+R3	244055	58	488227	488227	488804
222	TIM3+F	240326	57	480765	480765	481333
223	TIM3+F+I	239347	58	478809	478810	479387
224	TIM3+F+G4	239718	58	479552	479552	480130
225	TIM3+F+I+G4	239334	59	478787	478787	479374
226	TIM3+F+R2	239203	59	478523	478523	479111
227	TIM3+F+R3	239203	61	478527	478527	479135
235	TVMe	245069	55	490248	490248	490796
236	TVMe+I	243983	56	488079	488079	488637
237	TVMe+G4	244445	56	489001	489001	489559
238	TVMe+I+G4	243978	57	488069	488069	488637
239	TVMe+R2	243878	57	487870	487870	488438
240	TVMe+R3	243878	59	487874	487874	488462
248	TVM+F	240181	58	480478	480478	481056
249	TVM+F+I	239197	59	478512	478512	479100
250	TVM+F+G4	239573	59	479263	479263	479851
251	TVM+F+I+G4	239181	60	478482	478482	479080
252	TVM+F+R2	239057	60	478234	478235	478832
253	TVM+F+R3	239057	62	478238	478239	478856
261	SYM	245069	56	490249	490249	490807
262	SYM+I	243982	57	488078	488078	488646
263	SYM+G4	244444	57	489002	489002	489570
264	SYM+I+G4	243975	58	488067	488067	488644
265	SYM+R2	243877	58	487870	487870	488447
266	SYM+R3	243877	60	487874	487874	488471
274	GTR+F	240181	59	480480	480480	481067
275	GTR+F+I	239197	60	478513	478513	479111
276	GTR+F+G4	239572	60	479265	479265	479863
277	GTR+F+I+G4	239180	61	478482	478482	479089
278	GTR+F+R2	239057	61	478236	478236	478844
279	GTR+F+R3	239057	63	478240	478240	478868
Akaike Information Criterion: TVM+F+R2
Corrected Akaike Information Criterion: TVM+F+R2
Bayesian Information Criterion: TVM+F+R2
Best-fit model: TVM+F+R2 chosen according to BIC
