# Supplementary material for: Multiplexed Massively Parallel Sequencing of Plastomes Provides Insights Into the Genetic Diversity, Population Structure, and Phylogeography of Wild and Cultivated Coptis chinensis
Source: Front Plant Sci. 2022 Jul 7;13:923600. doi: 10.3389/fpls.2022.923600 (PMC9302112; doi:10.3389/fpls.2022.923600)
Supplement: Supplementary file 8 [file Table_5.XLSX]

## Sheet: Sheet1
Table S5. Detailed information of 38 population-specific variable pairs
Pairs No.	position	type	Ccc	Ccb
Cop006	236	snp	g	a
Cop010	65	snp	t	a
	243	snp	a	g
Cop013	227	snp	a	c
	253	snp	a	t
Cop015	198	snp	c	g
Cop017	66	snp	a	g
	74	snp	c	t
Cop019	186	snp	g	t
	258	snp	a	c
Cop020	89	snp	c	t
	200	snp	a	g
Cop022	42	snp	g	t
Cop025	343	snp	t	g
Cop027	44	snp	a	g
Cop029	252	snp	c	t
Cop030	227	snp	g	t
	274	snp	c	a
Cop036	22	snp	t	g
	312	snp	c	a
Cop037	217	indel	ataatgta	\
Cop043	183	snp	a	g
Cop048	248	snp	a	c
Cop050	22	snp	t	c
	35	snp	c	a
	192	snp	t	c
Cop051	57	snp	g	a
Cop054	59	snp	c	t
	74	snp	g	t
	98	indel	at	\
Cop062	355	snp	a	t
Cop065	26	snp	t	a
	27	snp	c	t
Cop066	105	snp	c	t
Cop069	23	snp	a	g
Cop071	189	snp	c	t
	221	snp	c	t
	239	snp	t	c
Cop072	273	snp	a	t
Cop073	26	snp	a	t
	218	indel	\	aggtaaat
Cop075	25	snp	a	g
Cop076	35	snp	a	c
Cop083	94	snp	a	g
	197	snp	a	g
Cop089	361	snp	t	c
Cop090	122	snp	g	c
Cop092	205	snp	a	c
Cop095	102	snp	a	c
Cop102	33	snp	g	a
	146	snp	g	a
Cop108	281	snp	c	t
Cop126	104	snp	g	t
	153	snp	a	c
	374	snp	a	c
Cop133	111	snp	t	c
Cop137	37	snp	g	a
	390	snp	g	t

## Sheet: Sheet2
1g020
1g054
g006
g010
g013
g015
g017
g019
g022
g025
g027
g029
g030
g036
g037
g043
g048
g050
g051
g062
g065
g066
g069
g071
g072
g073
g075
g076
g083
g089
g090
g092
g095
g102
g108
g126
g133
g137
